# Supplementary material for: Eco-friendly and techno-economic conversion of CO2into calcium formate, a valuable resource
Source: Royal Society of Chemistry journal article supplement (doi:10.1039/d1gc04606c), 2022-01-01
Supplement: d1gc04606c1.pdf [file d1gc04606c1.pdf]

## Supplementary information

### Eco-friendly and techno-economic conversion of CO<sub>2</sub> into calcium formate, a valuable resource

Hayoung Yoon, †<sup>a</sup> Taeksang Yoon, †<sup>b</sup> Ha-Jun Yoon<sup>b</sup>, Chul-Jin Lee<sup>\*b,c</sup> and Sungho Yoon<sup>\*a</sup>

<sup>a</sup>Department of Chemistry, Chung Ang University, 84 Heukseok-ro, Dongjak-gu, Seoul, Republic of Korea. E-mail: sunghoyoon@cau.ac.kr

<sup>b</sup>School of Chemical Engineering and Materials Science, Chung-Ang University, 84 Heukseok-ro, Dongjak-gu, Seoul, Republic of Korea.

<sup>c</sup>Department of Intelligent Energy and Industry, Chung Ang University, 84 Heukseok-ro, Dongjak-gu, Seoul, Republic of Korea. E-mail: cjlee@cau.ac.kr

### Contents

1. Conventional HCO<sub>2</sub>H production process and proposed Ca(HCO<sub>2</sub>)<sub>2</sub> production process
2. composition analysis of CO<sub>2</sub> hydrogenation adduct
3. Analysis of substances generated during separation of Ca(HCO<sub>2</sub>)<sub>2</sub> production
4. Ca(HCO<sub>2</sub>)<sub>2</sub> yield and amine loss according to the change of additives containing CaO
5. Techno-economic analysis
6. Life-cycle assessment

1. Conventional  $\text{HCO}_2\text{H}$  production process and proposed  $\text{Ca}(\text{HCO}_2)_2$  production process

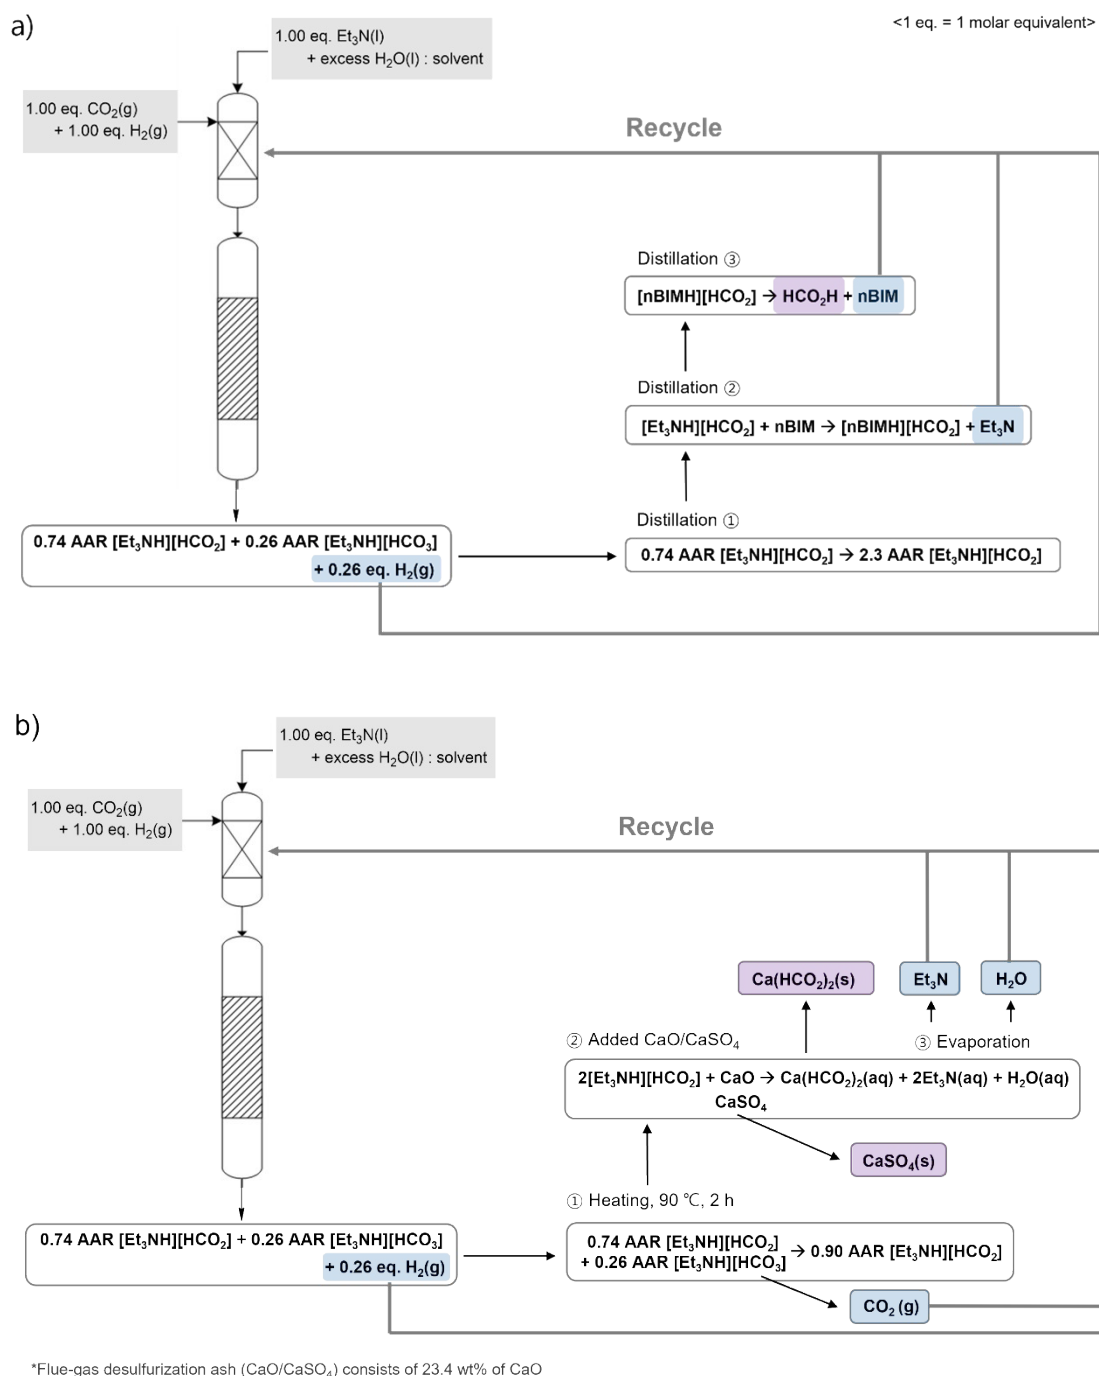

**Figure S1.** Detailed schematics of  $\text{CO}_2$  conversion into value-added chemicals: a) conventional  $\text{HCO}_2\text{H}$  production process and b) proposed  $\text{Ca}(\text{HCO}_2)_2$  production process. (AAR: acid to amine ratio)

2. composition analysis of CO<sub>2</sub> hydrogenation adduct

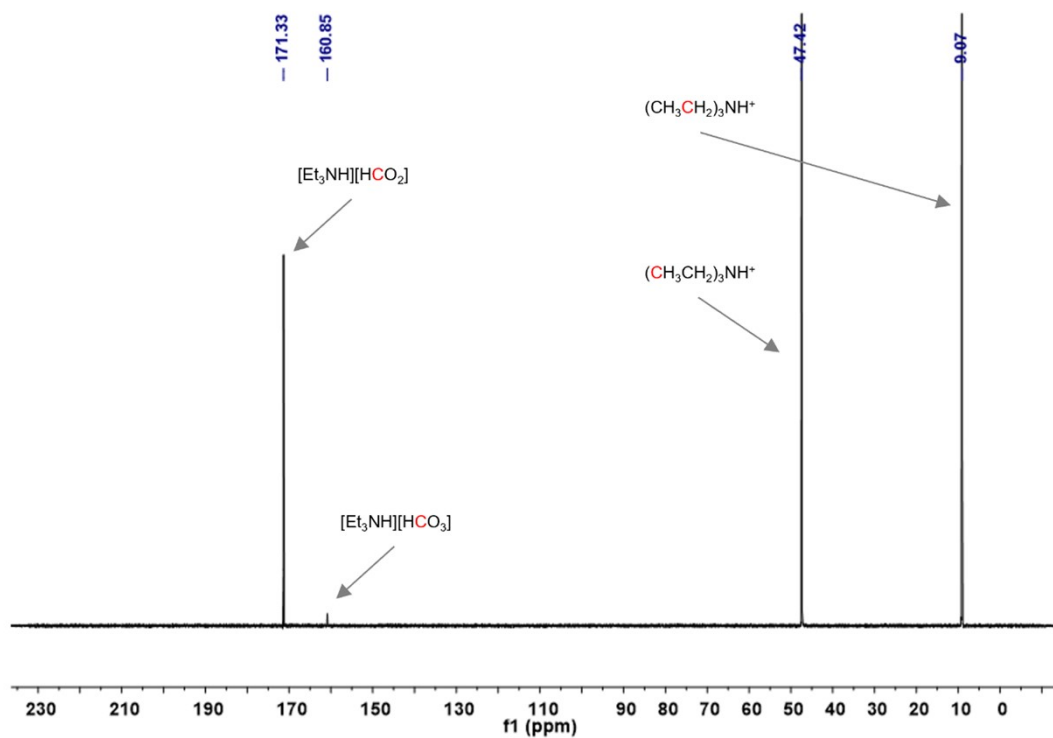

**Figure S2.** <sup>13</sup>C NMR analysis of the [Et<sub>3</sub>NH][HCO<sub>2</sub>] adduct generated by CO<sub>2</sub> hydrogenation.

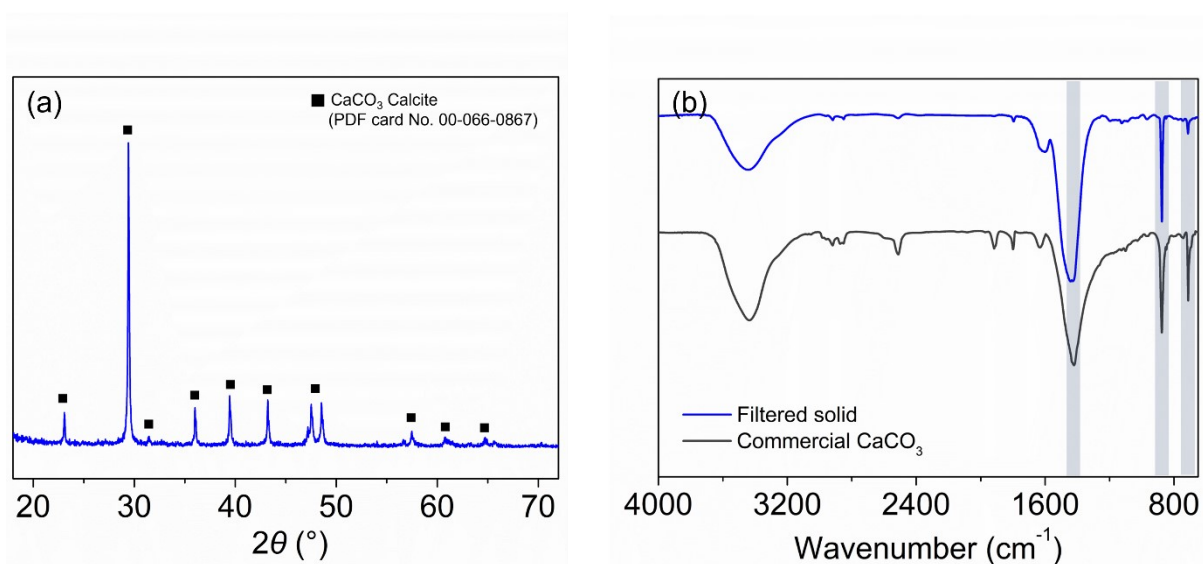

**Figure S3.** (a) XRD and (b) FT-IR analyses of filtered solid (blue) and commercial CaCO<sub>3</sub> (black) in a stirred solution obtained by adding CaO to the adduct containing bicarbonate.

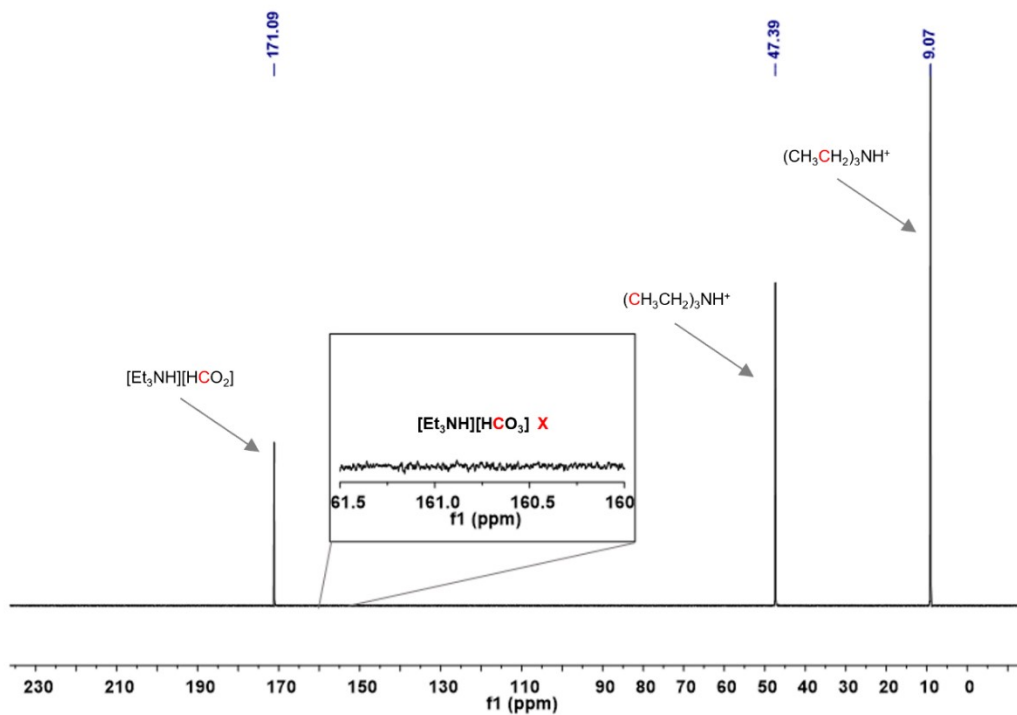

**Figure S4.**  $^{13}\text{C}$  NMR analysis of the adduct produced by  $\text{CO}_2$  hydrogenation after degassing at  $90^\circ\text{C}$  for 2 h.

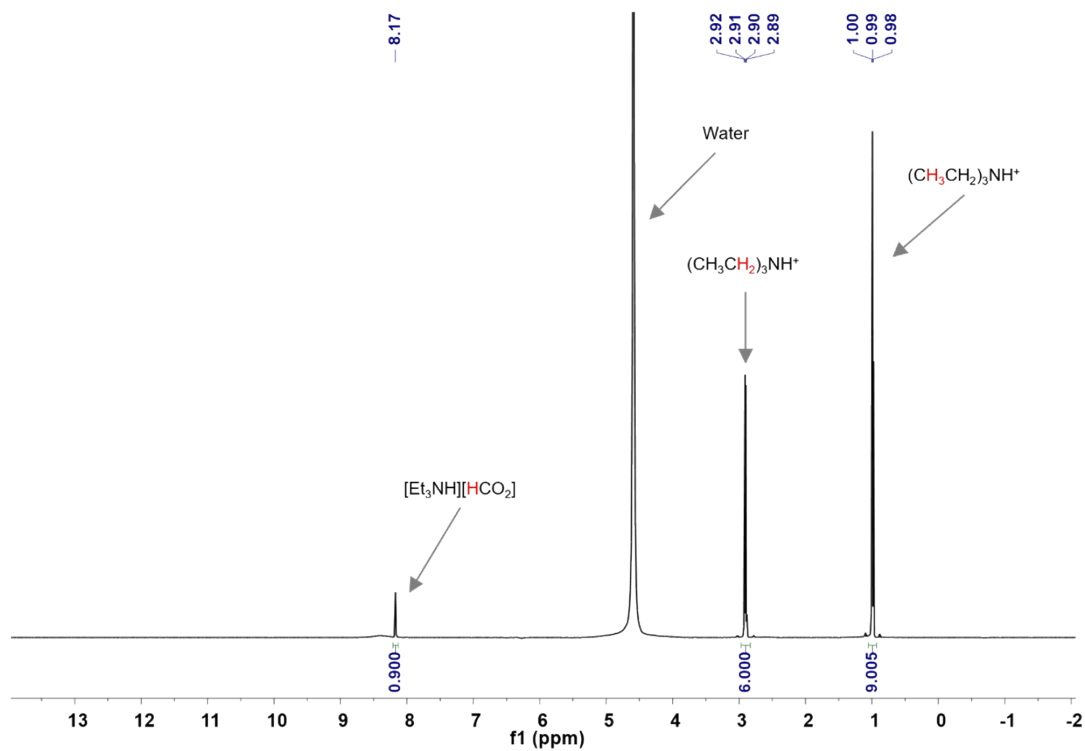

**Figure S5.**  $^1\text{H}$  NMR analysis of the adduct produced by  $\text{CO}_2$  hydrogenation after degassing at  $90^\circ\text{C}$  for 2 h.

3. Analysis of substances generated during separation of  $\text{Ca}(\text{HCO}_2)_2$  production

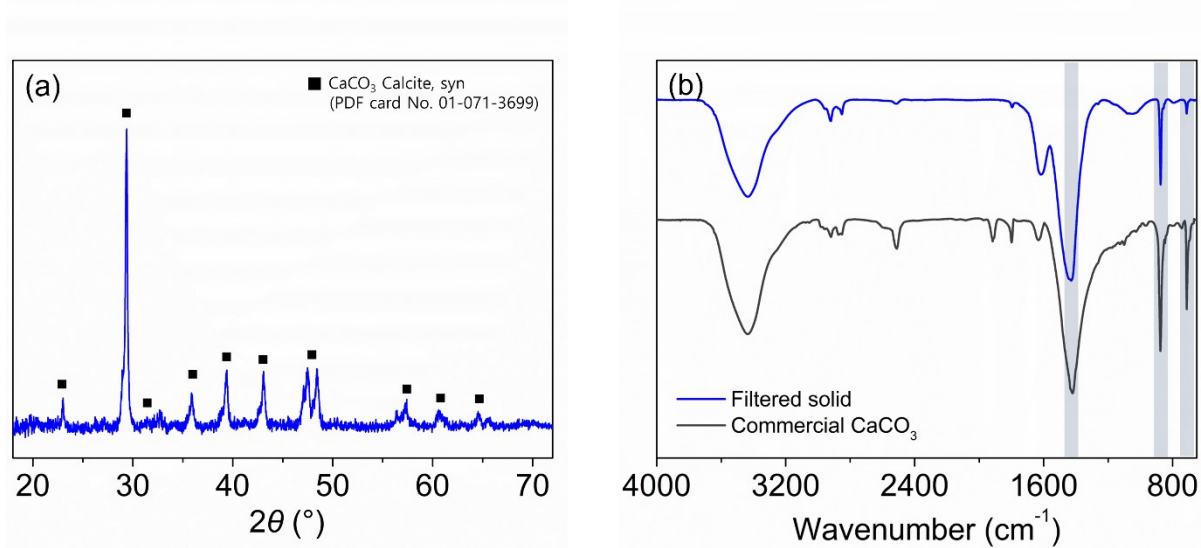

**Figure S6.** (a) XRD and (b) FT-IR analyses of the filtered solid produced during the synthesis of  $\text{Ca}(\text{HCO}_2)_2$  from  $[\text{Et}_3\text{NH}][\text{HCO}_2]$  by using  $\text{CaO}$ .

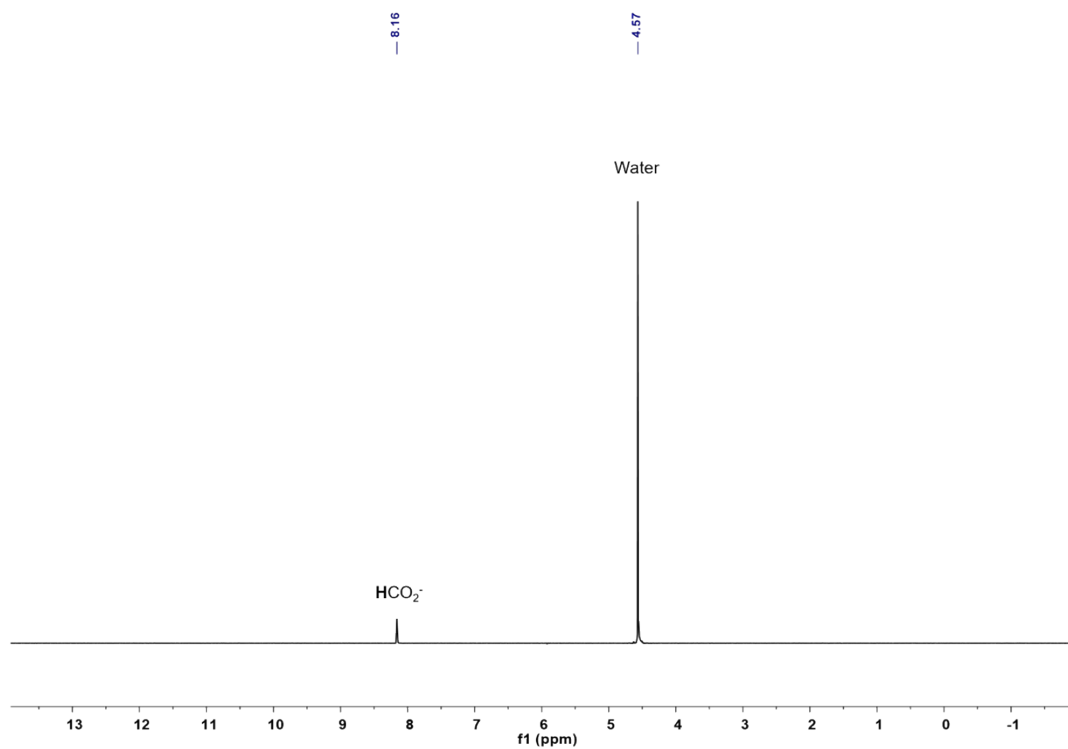

**Figure S7.**  $^1\text{H}$  NMR analysis of the evaporated solid produced during the synthesis of  $\text{Ca}(\text{HCO}_2)_2$  from  $[\text{Et}_3\text{NH}][\text{HCO}_2]$  by using  $\text{CaO}$ .

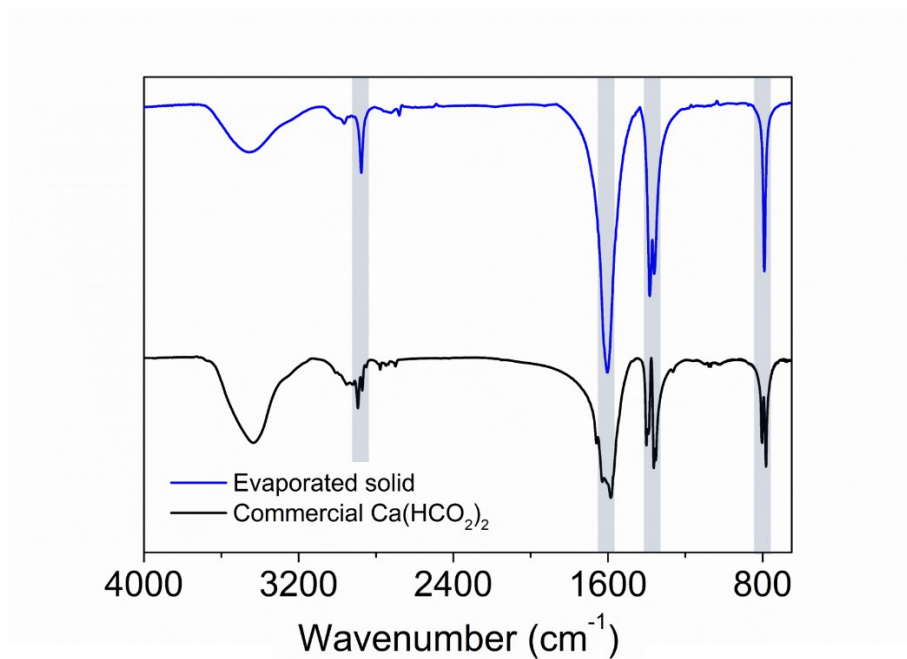

**Figure S8.** FT-IR analysis of the evaporated solid produced during the synthesis of Ca(HCO<sub>2</sub>)<sub>2</sub> from [Et<sub>3</sub>NH][HCO<sub>2</sub>] by using CaO.

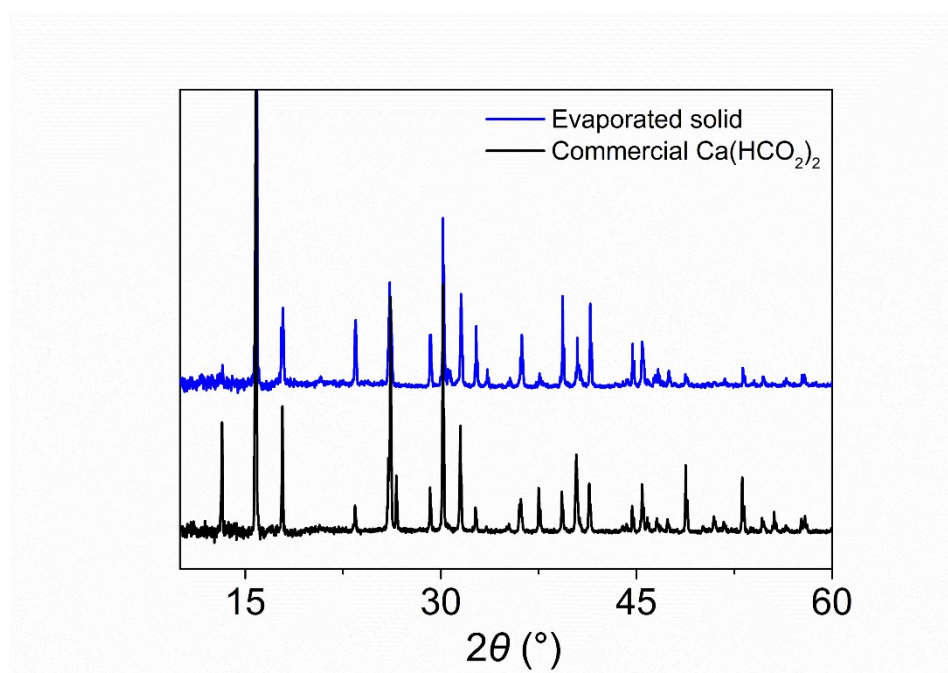

**Figure S9.** XRD image of Ca(HCO<sub>2</sub>)<sub>2</sub> obtained from [Et<sub>3</sub>NH][HCO<sub>2</sub>] by using CaO.

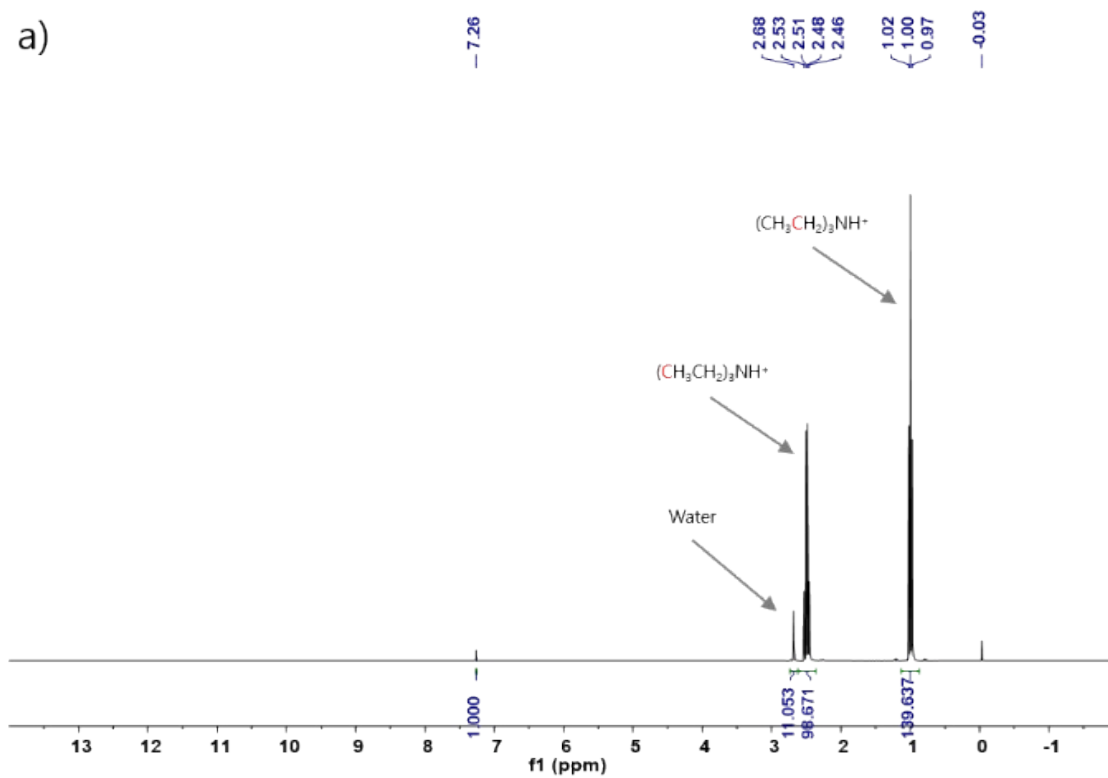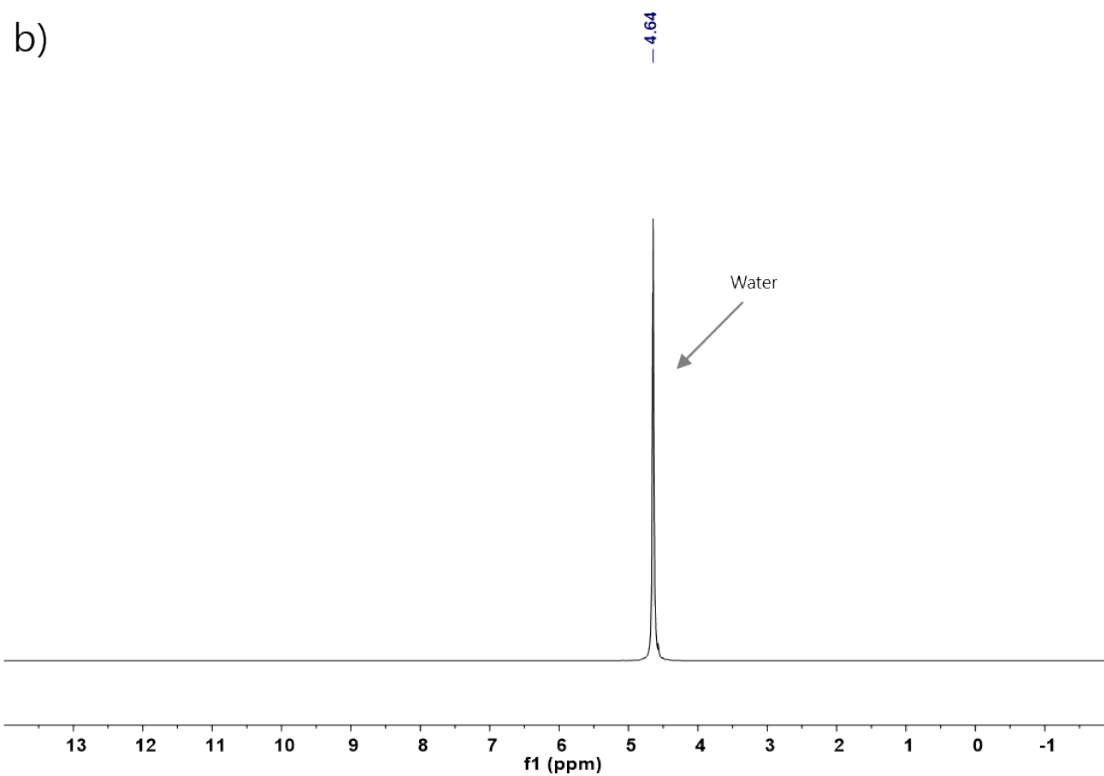

**Figure S10.**  $^1\text{H}$ -NMR data of a)  $\text{Et}_3\text{N}$  and b)  $\text{H}_2\text{O}$  obtained by evaporating the filtrate at 100 and 130  $^\circ\text{C}$ .

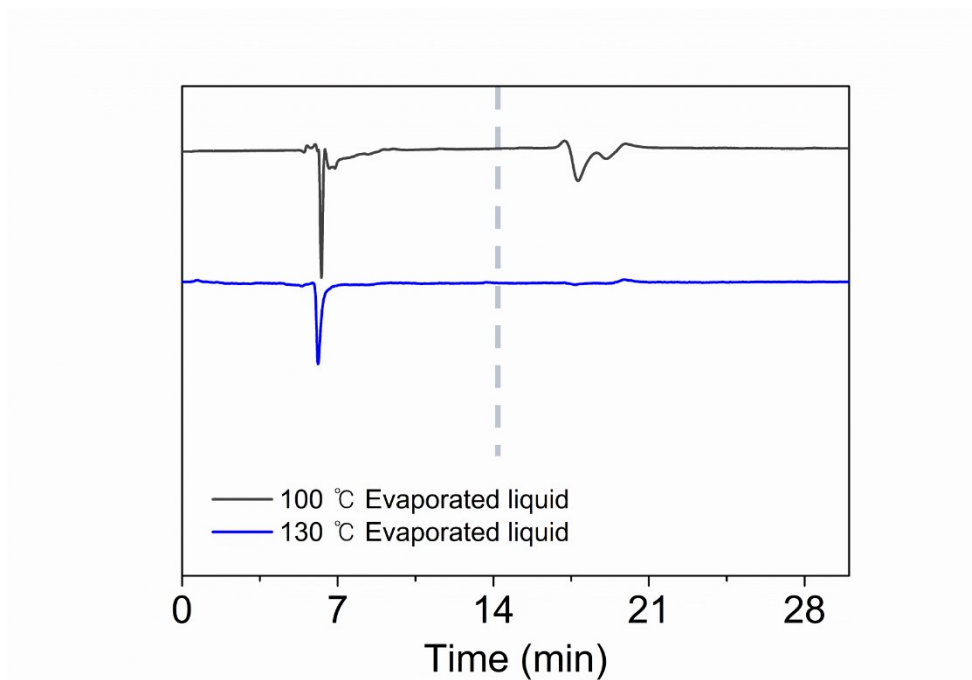

Figure S11. HPLC data of Et<sub>3</sub>N (black) and H<sub>2</sub>O (blue) obtained by evaporating the filtrate at 100 and 130 °C.

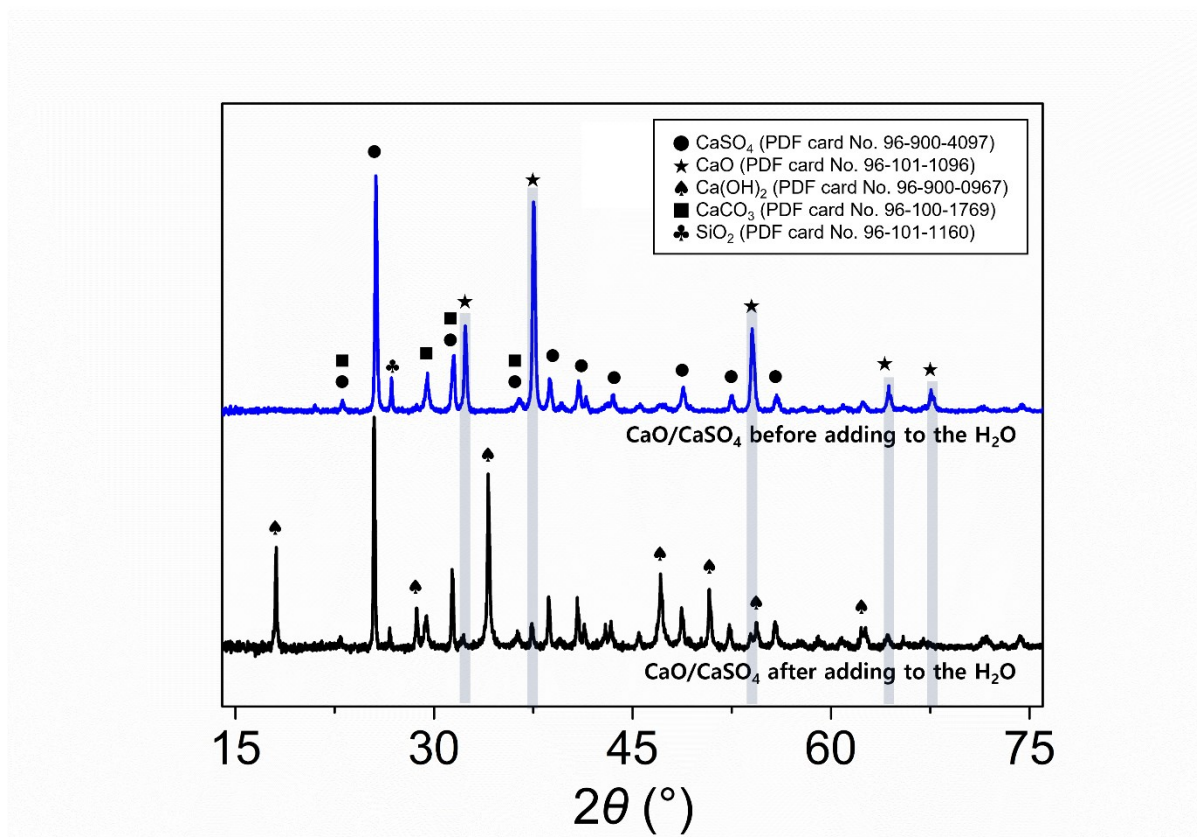

Figure S12. XRD image before and after adding CaO/CaSO<sub>4</sub> to the H<sub>2</sub>O.



4.  $\text{Ca}(\text{HCO}_2)_2$  yield and amine loss according to the change of additives containing CaO

**Table S1.**  $\text{Ca}(\text{HCO}_2)_2$  yields from the reaction between  $[\text{Et}_3\text{NH}][\text{HCO}_2]$  and CaO for various reaction times and temperatures.

| Entry | Temp. | Time   | $\text{Et}_3\text{N}$ | $\text{HCO}_2\text{H}$ | Added CaO | Reacted CaO | Reacted CaO | Produced $\text{Ca}(\text{HCO}_2)_2$ | Produced $\text{Ca}(\text{HCO}_2)_2$ |
|-------|-------|--------|-----------------------|------------------------|-----------|-------------|-------------|--------------------------------------|--------------------------------------|
|       | [°C]  | [h]    | [M]                   | [M]                    | [M]       | [M]         |             | [M]                                  |                                      |
| 1     | 30    | 0.0833 | 1.9008                | 1.7107                 | 0.8554    | 0.8547      | 99.93%      | 0.8434                               | 98.60%                               |
| 2     | 30    | 0.0833 | 1.9008                | 1.7107                 | 0.8554    | 0.8518      | 99.58%      | 0.8559                               | 100.06%                              |
| 3     | 30    | 0.5    | 1.9008                | 1.7107                 | 0.8554    | 0.8510      | 99.50%      | 0.8551                               | 99.97%                               |
| 4     | 30    | 0.5    | 1.9008                | 1.7107                 | 0.8554    | 0.8516      | 99.56%      | 0.8453                               | 98.83%                               |
| 5     | 30    | 2      | 1.9008                | 1.7107                 | 0.8554    | 0.8526      | 99.68%      | 0.8735                               | 102.13%                              |
| 6     | 30    | 2      | 1.9008                | 1.7107                 | 0.8554    | 0.8521      | 99.62%      | 0.8618                               | 100.75%                              |
| 7     | 30    | 15     | 1.9008                | 1.7107                 | 0.8554    | 0.8543      | 99.88%      | 0.8677                               | 101.44%                              |
| 8     | 30    | 15     | 1.9008                | 1.7107                 | 0.8554    | 0.8484      | 99.19%      | 0.8603                               | 100.58%                              |
| 9     | 30    | 60     | 1.9008                | 1.7107                 | 0.8554    | 0.8395      | 98.15%      | 0.8394                               | 98.13%                               |
| 10    | 30    | 60     | 1.9008                | 1.7107                 | 0.8554    | 0.8171      | 95.53%      | 0.8329                               | 97.37%                               |
| 11    | 45    | 0.0833 | 1.9008                | 1.7107                 | 0.8554    | 0.8539      | 99.83%      | 0.8584                               | 100.36%                              |
| 12    | 45    | 0.0833 | 1.9008                | 1.7107                 | 0.8554    | 0.8521      | 99.62%      | 0.8411                               | 98.33%                               |
| 13    | 60    | 0.0833 | 1.9008                | 1.7107                 | 0.8554    | 0.8521      | 99.62%      | 0.8664                               | 101.29%                              |
| 14    | 60    | 0.0833 | 1.9008                | 1.7107                 | 0.8554    | 0.8527      | 99.69%      | 0.8432                               | 98.57%                               |
| 15    | 75    | 0.0833 | 1.9008                | 1.7107                 | 0.8554    | 0.8520      | 99.61%      | 0.8536                               | 99.79%                               |
| 16    | 75    | 0.0833 | 1.9008                | 1.7107                 | 0.8554    | 0.8536      | 99.79%      | 0.8657                               | 101.21%                              |
| 17    | 90    | 0.0833 | 1.9008                | 1.7107                 | 0.8554    | 0.8536      | 99.79%      | 0.8217                               | 96.06%                               |
| 18    | 90    | 0.0833 | 1.9008                | 1.7107                 | 0.8554    | 0.8533      | 99.76%      | 0.8210                               | 95.98%                               |

**Table S2.** Ca(HCO<sub>2</sub>)<sub>2</sub> yields from the reaction between [Et<sub>3</sub>NH][HCO<sub>2</sub>] and the CaO-CaSO<sub>4</sub> mixture for various reaction times and temperatures.

| Entry | Temp. | Time   | Et <sub>3</sub> N | HCO <sub>2</sub> H | Added CaSO <sub>4</sub> | Added CaO | Reacted CaO | Reacted CaO | Produced Ca(HCO <sub>2</sub> ) <sub>2</sub> | Produced Ca(HCO <sub>2</sub> ) <sub>2</sub> |
|-------|-------|--------|-------------------|--------------------|-------------------------|-----------|-------------|-------------|---------------------------------------------|---------------------------------------------|
|       | [°C]  | [h]    | [M]               | [M]                | [M]                     | [M]       | [M]         |             | [M]                                         |                                             |
| 1     | 30    | 0.0833 | 1.9008            | 1.7107             | 0.8554                  | 0.8554    | 0.9034      | 105.62%     | 0.8852                                      | 103.49%                                     |
| 2     | 30    | 0.0833 | 1.9008            | 1.7107             | 0.8554                  | 0.8554    | 0.9014      | 105.38%     | 0.8606                                      | 100.61%                                     |
| 3     | 30    | 0.5    | 1.9008            | 1.7107             | 0.8554                  | 0.8554    | 0.8959      | 104.74%     | 0.8464                                      | 98.96%                                      |
| 4     | 30    | 0.5    | 1.9008            | 1.7107             | 0.8554                  | 0.8554    | 0.8821      | 103.13%     | 0.8310                                      | 97.16%                                      |
| 5     | 30    | 2      | 1.9008            | 1.7107             | 0.8554                  | 0.8554    | 0.8993      | 105.14%     | 0.8396                                      | 98.16%                                      |
| 6     | 30    | 2      | 1.9008            | 1.7107             | 0.8554                  | 0.8554    | 0.8864      | 103.63%     | 0.8553                                      | 99.99%                                      |
| 7     | 30    | 15     | 1.9008            | 1.7107             | 0.8554                  | 0.8554    | 0.8987      | 105.06%     | 0.8727                                      | 102.03%                                     |
| 8     | 30    | 15     | 1.9008            | 1.7107             | 0.8554                  | 0.8554    | 0.8332      | 97.41%      | 0.8530                                      | 99.72%                                      |
| 9     | 30    | 60     | 1.9008            | 1.7107             | 0.8554                  | 0.8554    | 0.9183      | 107.36%     | 0.8859                                      | 103.57%                                     |
| 10    | 30    | 60     | 1.9008            | 1.7107             | 0.8554                  | 0.8554    | 0.8946      | 104.59%     | 0.8676                                      | 101.43%                                     |
| 11    | 45    | 0.0833 | 1.9008            | 1.7107             | 0.8554                  | 0.8554    | 0.8819      | 103.11%     | 0.8474                                      | 99.07%                                      |
| 12    | 45    | 0.0833 | 1.9008            | 1.7107             | 0.8554                  | 0.8554    | 0.8736      | 102.14%     | 0.8634                                      | 100.94%                                     |
| 13    | 60    | 0.0833 | 1.9008            | 1.7107             | 0.8554                  | 0.8554    | 0.8973      | 104.90%     | 0.8629                                      | 100.89%                                     |
| 14    | 60    | 0.0833 | 1.9008            | 1.7107             | 0.8554                  | 0.8554    | 0.8899      | 104.04%     | 0.8540                                      | 99.84%                                      |
| 15    | 75    | 0.0833 | 1.9008            | 1.7107             | 0.8554                  | 0.8554    | 0.9084      | 106.20%     | 0.9053                                      | 105.84%                                     |
| 16    | 75    | 0.0833 | 1.9008            | 1.7107             | 0.8554                  | 0.8554    | 0.8887      | 103.89%     | 0.8722                                      | 101.97%                                     |
| 17    | 90    | 0.0833 | 1.9008            | 1.7107             | 0.8554                  | 0.8554    | 0.9037      | 105.65%     | 0.8669                                      | 101.35%                                     |
| 18    | 90    | 0.0833 | 1.9008            | 1.7107             | 0.8554                  | 0.8554    | 0.8843      | 103.39%     | 0.8650                                      | 101.12%                                     |

**Table S3.** Ca(HCO<sub>2</sub>)<sub>2</sub> yields from the reaction between [Et<sub>3</sub>NH][HCO<sub>2</sub>] and the ash in the desulfurization process (CaO 23.4wt%).

| Temp. | Time  | Et <sub>3</sub> N | HCO <sub>2</sub> H | Added CaO | Reacted CaO | Reacted CaO | Produced Ca(HCO <sub>2</sub> ) <sub>2</sub> | Produced Ca(HCO <sub>2</sub> ) <sub>2</sub> |
|-------|-------|-------------------|--------------------|-----------|-------------|-------------|---------------------------------------------|---------------------------------------------|
| [°C]  | [min] | [M]               | [M]                | [M]       | [M]         |             | [M]                                         |                                             |
| 30    | 5     | 1.9008            | 1.7107             | 0.9593    | 0.8529      | 99.71%      | 0.8624                                      | 100.83%                                     |

**Table S4.** Amine loss during synthesis of Ca(HCO<sub>2</sub>)<sub>2</sub> from [Et<sub>3</sub>NH][HCO<sub>2</sub>] by using (1) CaO, (2) CaO+CaSO<sub>4</sub> and (3) ash in desulfurization process.

| Entry    | HCO <sub>2</sub> H | Et <sub>3</sub> N | Temp. | Time  | Added CaO | Produced Ca(HCO <sub>2</sub> ) <sub>2</sub> | Produced Ca(HCO <sub>2</sub> ) <sub>2</sub> | Produced amine | Amine loss |
|----------|--------------------|-------------------|-------|-------|-----------|---------------------------------------------|---------------------------------------------|----------------|------------|
|          | [M]                | [M]               | [°C]  | [min] | [M]       | [M]                                         | %                                           |                |            |
| <b>1</b> | 1.7107             | 1.9008            | 30    | 5     | 0.8554    | 0.8559                                      | 100.06%                                     | 100.06%        | <b>0%</b>  |
| <b>2</b> | 1.7107             | 1.9008            | 30    | 5     | 0.8554    | 0.8606                                      | 100.61%                                     | 100.61%        | <b>0%</b>  |
| <b>3</b> | 1.7107             | 1.9008            | 30    | 5     | 0.8554    | 0.8624                                      | 100.82%                                     | 100.82%        | <b>0%</b>  |

## 5. Techno-economic analysis

**Table S5.** Parameters used and assumptions made for the economic analysis<sup>1,2</sup>

|                                                              | Parameter                                                                                              | Value           |
|--------------------------------------------------------------|--------------------------------------------------------------------------------------------------------|-----------------|
| Assumptions                                                  | (1) Annual Ca(HCO <sub>2</sub> ) <sub>2</sub> production<br>(t Ca(HCO <sub>2</sub> ) <sub>2</sub> /yr) | 38,500          |
|                                                              | (2) Economic life of the plant (yr)                                                                    | 20              |
|                                                              | (3) Annual operating hours (hr/yr)                                                                     | 8,000           |
|                                                              | (4) Interest rate (%)                                                                                  | 8               |
|                                                              | (5) Tax rate (%)                                                                                       | 35              |
|                                                              | (5) Depreciation method                                                                                | Straightforward |
|                                                              | (6) Direct supervisory and clerical labor<br>(% of operating labor cost)                               | 17              |
|                                                              | (7) Maintenance and repairs<br>(% of fixed capital investment cost)                                    | 6               |
|                                                              | (8) Operating supplies<br>(% of maintenance and repairs cost)                                          | 15              |
|                                                              | (9) Laboratory charges<br>(% of operating labor cost)                                                  | 15              |
|                                                              | (10) Patents and royalties<br>(% of total operating cost)                                              | 3               |
|                                                              | (11) Taxes and insurance<br>(% of fixed capital investment cost)                                       | 2               |
|                                                              | (12) Plant overhead costs<br>(% of operating labor, (6) and (7))                                       | 60              |
|                                                              | (13) Administration costs<br>(% of operating labor, (6) and (7))                                       | 15              |
|                                                              | (14) Distribution and selling cost<br>(% of total operating cost)                                      | 11              |
| (15) Research and development<br>(% of total operating cost) | 5                                                                                                      |                 |
| Utilities                                                    | (16) Low-pressure steam (USD/GJ)                                                                       | 13.28           |
|                                                              | (17) Electricity (Conventional) (USD/kWh)                                                              | 0.07            |
|                                                              | (18) Electricity (Renewable) (USD/kWh)                                                                 | 0.14            |
|                                                              | (19) Cooling water (USD/ton)                                                                           | 0.354           |

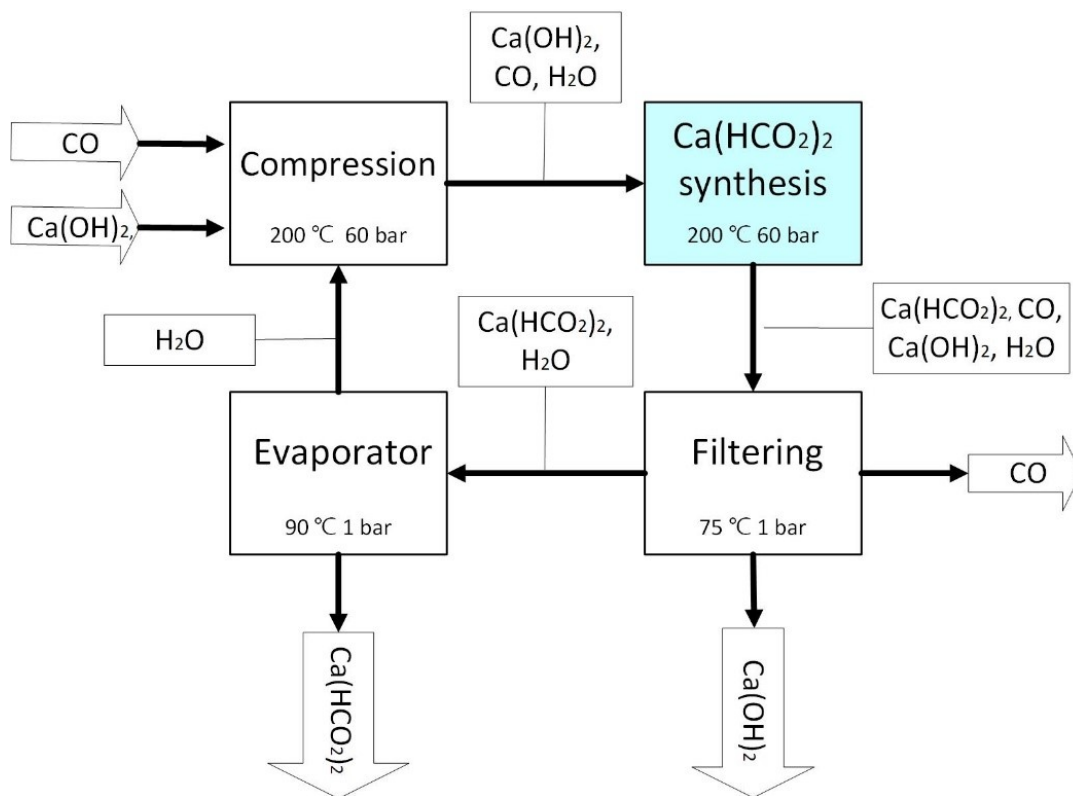

**Figure S13.** Block flow diagram of the process of  $\text{Ca}(\text{HCO}_2)_2$  production from  $\text{CO}$  and  $\text{Ca}(\text{OH})_2$ .

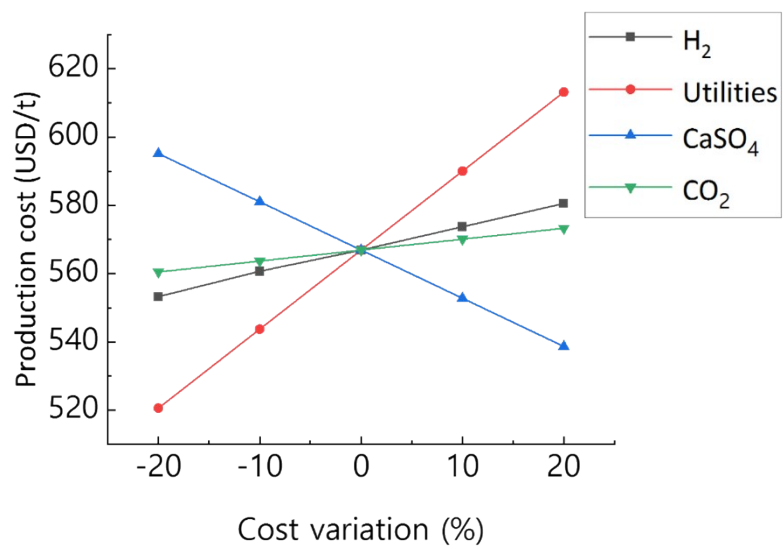

**Figure S14.** Sensitivity analysis of the  $\text{Ca}(\text{HCO}_2)_2$  production cost for the fluctuation of  $\text{H}_2$  from SMR (black), utilities (red),  $\text{CO}_2$  (green), and  $\text{CaSO}_4$  (blue).

6. Life-cycle assessment

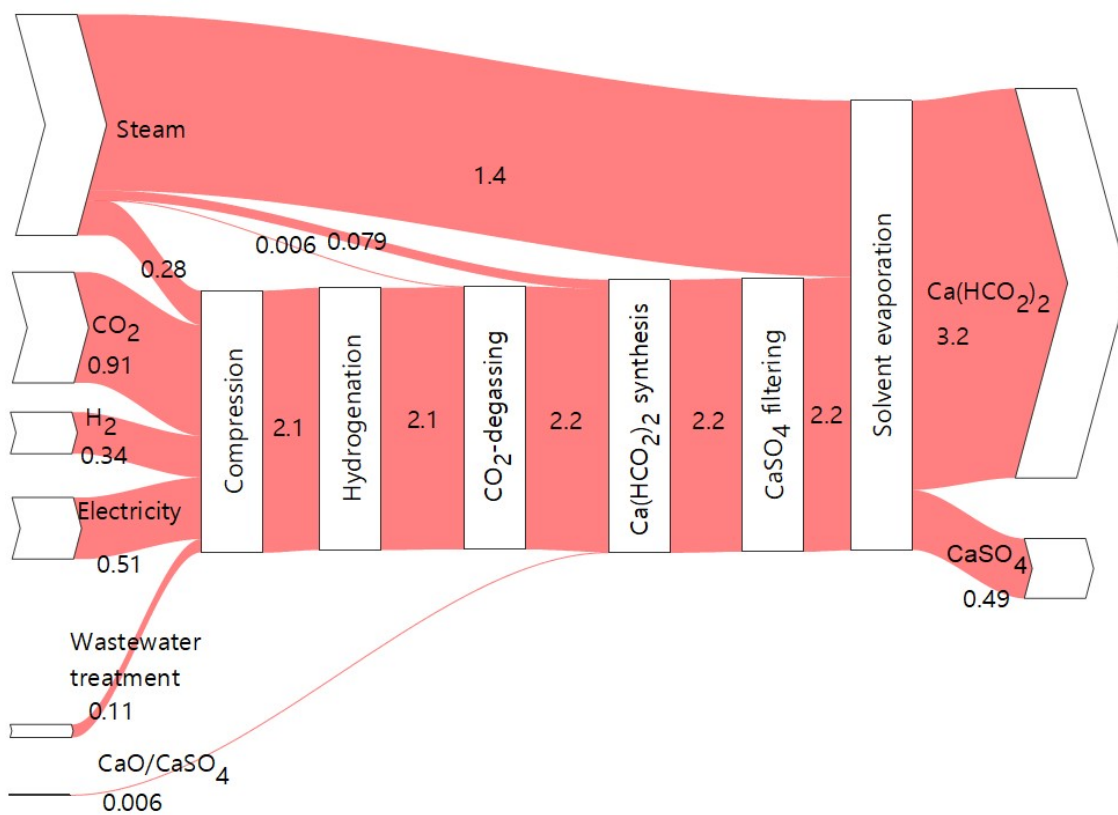

**Figure S15.** Sankey diagram for the GW index of the proposed process (H<sub>2</sub> from SMR) (unit: kg CO<sub>2</sub>-eq/kg Ca(HCO<sub>2</sub>)<sub>2</sub>).

**Table S6.** Parameters used for the environmental analysis.

| Inflows                            | Database                                                                                                  | Note                             |
|------------------------------------|-----------------------------------------------------------------------------------------------------------|----------------------------------|
| <b>Material</b>                    |                                                                                                           |                                  |
| H <sub>2</sub> <sup>3</sup>        | Hydrogen (reformer) E                                                                                     | H <sub>2</sub> from SMR          |
| CO <sub>2</sub> <sup>4</sup>       | Carbon dioxide, liquid   market for   Cut-off, S                                                          |                                  |
| CaO/CaSO <sub>4</sub> <sup>4</sup> | Waste gypsum   market for   Cut-off, S                                                                    |                                  |
| CO <sup>4</sup>                    | Carbon monoxide   market for   Cut-off, S                                                                 |                                  |
| Ca(OH) <sub>2</sub> <sup>4</sup>   | Lime, hydrated, packed   market for   Cut-off, S                                                          |                                  |
| H <sub>2</sub> O <sup>4</sup>      | Water, completely softened   market for   Cut-off, S                                                      |                                  |
| Et <sub>3</sub> N                  | Triethyl amine {GLO}   market for   Cut-off, S                                                            |                                  |
| <b>Utilities</b>                   |                                                                                                           |                                  |
| Steam <sup>4</sup>                 | Heat, from steam, in chemical industry   market for   Cut-off, S                                          |                                  |
| Electricity <sup>4</sup>           | Electricity, high voltage <sup>2</sup>   heat and power co-generation, hard coal   Cut-off, S             |                                  |
| Electricity <sup>4,5</sup>         | Electricity, low voltage <sup>2</sup>   electricity production, photovoltaic, 570kWp open   Cut-off, S    | H <sub>2</sub> from Electrolysis |
| Electricity <sup>4,5</sup>         | Electricity, high voltage <sup>2</sup>   electricity production, wind, >3MW turbine, onshore   Cut-off, S | H <sub>2</sub> from Electrolysis |
| <b>Outflows</b>                    |                                                                                                           |                                  |
| Wastewater <sup>4</sup>            | Wastewater, average   treatment of, capacity 1E9l/year   Cut-off, S                                       |                                  |
| Inert waste <sup>4</sup>           | Inert waste   treatment of, sanitary landfill   Cut-off, S                                                |                                  |

1. R. Turton, R. C. Bailie, W. B. Whiting and J. A. Shaeiwitz, *Analysis, synthesis and design of chemical processes*, Pearson Education, 2008.
2. L. a. K.-H. G-D, Kim, Establishment and operation of mid- to long-term unit cost (LCOE) forecasting system for expanding renewable energy supply, [https://www.keei.re.kr/main.nsf/index.html?open&p=%2Fweb\\_keei%2Fd\\_results.nsf%2Fmain\\_all%2FA10FCB3438C55F4349258669004FC436&s=%3FOpenDocument%26menucode%3DS0%26category%3D%25EA%25B8%25B0%25EB%25B3%25B8%25EC%2597%25B0%25EA%25B5%25AC](https://www.keei.re.kr/main.nsf/index.html?open&p=%2Fweb_keei%2Fd_results.nsf%2Fmain_all%2FA10FCB3438C55F4349258669004FC436&s=%3FOpenDocument%26menucode%3DS0%26category%3D%25EA%25B8%25B0%25EB%25B3%25B8%25EC%2597%25B0%25EA%25B5%25AC).
3. Eco-profiles, <https://www.plasticseurope.org/en/resources/eco-profiles>, 2005.
4. G. Wernet, C. Bauer, B. Steubing, J. Reinhard, E. Moreno-Ruiz and B. Weidema, *The International Journal of Life Cycle Assessment*, 2016, **21**, 1218-1230.
5. A. Al-Qahtani, B. Parkinson, K. Hellgardt, N. Shah and G. Guillen-Gosalbez, *Applied Energy*, 2021, **281**, 115958.
